# Supplementary material for: Long-term projections of global water use for electricity generation under the Shared Socioeconomic Pathways and climate mitigation scenarios
Source: Copernicus journal article supplement (doi:10.5194/hess-2017-27), 2017-03-21
Supplement: Supplementary file 1 [file hess-2017-27-supplement.pdf]

1 Supplement

2

3 **Long-term projections of global water use for electricity generation under the**  
4 **Shared Socioeconomic Pathways and climate mitigation scenarios**

5

6 Nozomi Ando<sup>1</sup>, Sayaka Yoshikawa<sup>1</sup>, Shinichiro Fujimori<sup>2</sup>, and Shinjiro Kanae<sup>1</sup>

7

8 <sup>1</sup>School of Environment and Society, Tokyo Institute of Technology, 2-12-1 O-okayama, Meguro-ku, Tokyo 152-  
9 8552, Japan

10 <sup>2</sup>National Institute for Environmental Studies, 16-2 Onogawa, Tsukuba, 305-8506, Japan

11

12 *Correspondence to:* S. Yoshikawa (yoshikawa.s.ad@m.titech.ac.jp) and N. Ando (ando.n.titech@gmail.com)

13

14

15

16 **S1. AIM/CGE regions**

17

18 Table S1 lists the definitions of the Asia-Pacific Integrated/Computable General Equilibrium (AIM/CGE)  
19 regions, while Fig. S1 shows the distribution of the AIM/CGE regions.

20

21 **S2. Regional results**

22

23 Figure S2 shows regional water consumption differences under the recent-trend cooling case in 2100 among the  
24 Shared Socioeconomic Pathways (SSPs) and climate mitigation scenarios.

25 Figure S3 shows electricity generation under the baseline case for SSP1–5 in the Middle East. Figure S4 compares  
26 electricity generation for the SSPs and climate mitigation scenarios in the Middle East.

27

28 **S3. Comparison with previous studies**

29

30 **S3.1. Comparison of water use for electricity generation with Davies et al. (2013), Kyle et al. (2013), Hejazi**  
31 **et al. (2014), and Bijl et al. (2016)**

32

33 Figure S5 illustrates the water withdrawal and consumption for electricity generation in this study and previous  
34 studies. For clarity, only water withdrawal and consumption under the baseline and 3.4W cases are shown.

35 Similar to this study, previous studies on a global scale assessed the impacts of demand drivers that affect water use  
36 for electricity generation. Davies et al. (2013) focused on uncertainties in water use intensities, power plant cooling  
37 system changes, and adoption rates of water-saving technologies. Kyle et al. (2013) assessed the effects of climate  
38 change mitigation policies by comparing different climate mitigation levels and different energy source compositions.  
39 Hejazi et al. (2014) estimated future water use (including water use for electricity generation) under different  
40 socioeconomic scenarios characterized by possible economic, demographic, and technological improvements. These  
41 three studies applied the same methodology over a target period of 2005–2095 using the Global Change Assessment  
42 Model, an integrated assessment model. Bijl et al. (2016) estimated non-agriculture water use (including water use  
43 for electricity generation) under socioeconomic scenarios following the narratives of the SSPs and different efficiency  
44 assumptions from 1971 to 2100. There were several differences in the methods between this study and these previous  
45 studies, including the future scenarios and assumptions of future technological improvements. One of the largest  
46 differences was that we considered both socioeconomic changes and climate mitigation changes using the latest  
47 scenarios on global change based on the socioeconomic scenarios of the SSPs and climate mitigation scenarios based  
48 on representative concentration pathways (RCPs).

49 Our estimates of water withdrawal and water consumption without hydropower were mostly within the range  
50 of the previous estimates. However, water withdrawal and water consumption without hydropower under SSP5 were  
51 considerably larger than previous estimates. There are two explanations for this discrepancy. First, compared to  
52 previous studies, the composition of energy sources in SSP5 depended more on fossil fuels and biomass power, which  
53 required more water. Second, we did not consider any technological improvements beyond the shift in cooling system

54 type (e.g., improvements in power plant efficiency and introduction of water-saving technologies). Based on the SSP  
55 narratives, the level of technological improvement is high in SSP1 and SSP5, low in SSP3 and SSP4, and moderate  
56 in SSP2. However, these technological improvements are expressed only by the technological improvement rate,  
57 which would have increased the uncertainty of our results; therefore, we did not take this factor into account.

58 Overall, water consumption for hydropower was larger than previous estimates, especially in the first half of the  
59 target period, because the electricity generation from hydropower in this study began to increase sooner compared  
60 with previous studies. In addition, SSP5 had a considerably larger water consumption with hydropower than previous  
61 estimates, similar to the case of water withdrawal and water consumption without hydropower. However, water  
62 consumption under RE\_3.7 in Kyle et al. (2013) was similar, because the electricity generation share of concentrating  
63 solar power and geothermal power, which had considerable water consumptions, was very high.

64

### 65 **S3.2. Comparison of water withdrawal for electricity generation with Fujimori et al. (2016a)**

66

67 Figure S6 shows the global water withdrawal for electricity generation compared with the results of Fujimori et  
68 al. (2016a) and the industrial water withdrawal results of Hanasaki et al. (2013) (see Sect. S3.3). In Fujimori et al.  
69 (2016a), water withdrawal for electricity generation was estimated as part of industrial water withdrawal. Both studies  
70 used the SSPs as socioeconomic scenarios.

71 We used same electricity generation data as Fujimori et al. (2016a); however, our results were not the same. One  
72 possibly important difference between our study and Fujimori et al. (2016a) was their application of technological  
73 improvements. Fujimori et al. (2016a) applied technological improvement rates to water use intensity. They assumed  
74 that the technological improvement rates were consistent with SSP narratives; the rate of SSP3 and SSP4 was one-  
75 quarter while the rate of SSP2 was one-half those of SSP1 and SSP5. However, they found that their results were  
76 highly dependent on the technological improvement rate assumptions. For example, water withdrawal in SSP1 was  
77 smaller than that in SSP2, mainly due to the higher technological improvement rate in SSP1. In addition, they found  
78 that future technological improvements were difficult to predict and had large uncertainties.

79 In this study, we made assumptions on the shift in the proportion of cooling system types in use to represent one  
80 technological improvement. As mentioned in Sect. S3.1, we did not consider other technological improvements, such  
81 as power plant efficiency improvements or the introduction of water-saving technologies, to avoid increasing the  
82 uncertainty. Our water withdrawal and consumption results were generally larger than those of Fujimori et al. (2016a).  
83 However, our results would have been lower if we had considered additional technological improvements.

84 Fujimori et al. (2016a) applied different technological improvement rates to each SSP, consistent with the SSP  
85 narratives. Meanwhile, we applied the same cooling system type assumptions to all SSPs. By applying the same  
86 assumptions to all SSPs, we obtained the following results. SSP1 had the smallest water withdrawal and consumption  
87 among the SSPs, even though we did not consider differences in technological improvements in the SSPs. SSP2 and  
88 SSP4 had similar average water withdrawals and consumptions (Sect. 3.2). If we had considered differences in  
89 technological improvements, the average water withdrawal and consumption in SSP2 would have been smaller than  
90 that in SSP4, because the rate of technological improvement in SSP2 is higher than that in SSP4. The average water  
91 withdrawal and consumption in SSP3 was smaller than that in SSP2. However, the relationship between SSP2 and

92 SSP3 could have been reversed if differences in technological improvements had been considered, because the  
93 technological improvement rate in SSP2 is higher than that in SSP3. The technological improvement rate in SSP5  
94 was the highest among the SSPs. However, great efforts would be required to make water withdrawal and  
95 consumption in SSP5 smaller than those of other SSPs, even if we had considered the differences in technological  
96 improvements, because they were at least two times larger than those of other SSPs. Therefore, if we had considered  
97 the differences in technological improvements among the SSPs, the relationships among SSPs might have changed  
98 from  $SSP1 < SSP3 < SSP2 = SSP4 < SSP5$  to  $SSP1 < SSP2/SSP3 < SSP4 < SSP5$ .

99

### 100 **S3.3. Comparison of water withdrawal for electricity generation with industrial water withdrawal in** 101 **Hanasaki et al. (2013)**

102

103 Water use for electricity generation is included in industrial water use. However, our results of water withdrawal  
104 for electricity generation under SSP1 and SSP5 in 2100 were about 2 and 3.5 times larger than the industrial water  
105 withdrawal in 2085 determined by Hanasaki et al. (2013) (Fig. S6). This was because Hanasaki et al. (2013) assumed  
106 high technological improvement rates in SSP1 and SSP5, similar to the assumptions of Fujimori et al. (2016). In  
107 addition, Hanasaki et al. (2013) did not consider the effect of energy source composition. In particular, in SSP5,  
108 electricity generation depends on fossil fuel, which requires a large amount of water. Therefore, the water withdrawal  
109 in SSP5 of Hanasaki et al. (2013) was much smaller than both of our results and those of Fujimori et al. (2016).  
110 Hanasaki et al. (2013) suggested that the water withdrawals in SSP1 and SSP5 were smaller than the other SSPs due  
111 to higher technological improvements. However, we found that the relationships among the SSPs changed by  
112 considering the effect of energy-related factors.

113

114

115

Table S1 Definitions of the AIM/CGE regions.

| No. | Regions             | (Code) | Countries                                                                                                                                                                                                                                                                                                                                                                                                                                                                                                                                                                                                     |
|-----|---------------------|--------|---------------------------------------------------------------------------------------------------------------------------------------------------------------------------------------------------------------------------------------------------------------------------------------------------------------------------------------------------------------------------------------------------------------------------------------------------------------------------------------------------------------------------------------------------------------------------------------------------------------|
| 1   | Oceania             | XOC    | AUSTRALIA, NEW ZEALAND                                                                                                                                                                                                                                                                                                                                                                                                                                                                                                                                                                                        |
| 2   | Canada              | CAN    | CANADA                                                                                                                                                                                                                                                                                                                                                                                                                                                                                                                                                                                                        |
| 3   | EU25                | XE25   | AUSTRIA, BELGIUM, CYPRUS, CZECH REPUBLIC, DENMARK, ESTONIA, FINLAND, FRANCE, GERMANY, GREECE, HUNGARY, IRELAND, ITALY, LATVIA, LITHUANIA, LUXEMBOURG, MALTA, NETHERLANDS, POLAND, PORTUGAL, SLOVAKIA, SLOVENIA, SPAIN, SWEDEN, UNITED KINGDOM                                                                                                                                                                                                                                                                                                                                                                 |
| 4   | Rest of Europe      | XER    | ALBANIA, ANDORRA, BOSNIA AND HERZEGOVINA, BULGARIA, CROATIA, FAROE ISLANDS, GIBRALTAR, HOLY SEE (VATICAN CITY STATE), ICELAND, LIECHTENSTEIN, THE FORMER YUGOSLAV REPUBLIC OF MACEDONIA, MONACO, MONTENEGRO, NORWAY, ROMANIA, SAN, MARINO, SERBIA, SVALBARD AND JAN MAYEN, SWITZERLAND                                                                                                                                                                                                                                                                                                                        |
| 5   | Former Soviet Union | CIS    | ARMENIA, AZERBAIJAN, BELARUS, GEORGIA, KAZAKSTAN, KYRGYZSTAN, REPUBLIC OF MOLDOVA, TAJIKISTAN, TURKMENISTAN, UKRAINE, UZBEKISTAN                                                                                                                                                                                                                                                                                                                                                                                                                                                                              |
| 6   | Japan               | JPN    | JAPAN                                                                                                                                                                                                                                                                                                                                                                                                                                                                                                                                                                                                         |
| 7   | United States       | USA    | UNITED STATES                                                                                                                                                                                                                                                                                                                                                                                                                                                                                                                                                                                                 |
| 8   | North Africa        | XNF    | ALGERIA, EGYPT, LIBYAN ARAB JAMAHIRIYA, MOROCCO, TUNISIA                                                                                                                                                                                                                                                                                                                                                                                                                                                                                                                                                      |
| 9   | Rest of Africa      | XAF    | ANGOLA, BENIN, BOTSWANA, BURKINA FASO, BURUNDI, CAMEROON, CAPE VERDE, CENTRAL AFRICAN REPUBLIC, CHAD, COMOROS, CONGO, THE DEMOCRATIC REPUBLIC OF THE CONGO, CÔTE D'IVOIRE, DJIBOUTI, EQUATORIAL GUINEA, ERITREA, ETHIOPIA, GABON, GAMBIA, GHANA, GUINEA, GUINEA-BISSAU, KENYA, LESOTHO, LIBERIA, MADAGASCAR, MALAWI, MALI, MAURITANIA, MAURITIUS, MAYOTTE, MOZAMBIQUE, NAMIBIA, NIGER, NIGERIA, RÉUNION, RWANDA, SAINT HELENA, SAO TOME AND PRINCIPE, SENEGAL, SEYCHELLES, SIERRA LEONE, SOMALIA, SOUTH AFRICA, SUDAN, SWAZILAND, UNITED REPUBLIC OF TANZANIA, TOGO, UGANDA, WESTERN SAHARA, ZAMBIA, ZIMBABWE |
| 10  | China               | CHN    | CHINA, HONG KONG                                                                                                                                                                                                                                                                                                                                                                                                                                                                                                                                                                                              |

|    |                       |     |                                                                                                                                                                                                                                                                                                                                                                                                                                                                                                                                                                                                                                                                                                                                 |
|----|-----------------------|-----|---------------------------------------------------------------------------------------------------------------------------------------------------------------------------------------------------------------------------------------------------------------------------------------------------------------------------------------------------------------------------------------------------------------------------------------------------------------------------------------------------------------------------------------------------------------------------------------------------------------------------------------------------------------------------------------------------------------------------------|
| 11 | India                 | IND | INDIA                                                                                                                                                                                                                                                                                                                                                                                                                                                                                                                                                                                                                                                                                                                           |
| 12 | Southeast Asia        | XSE | CAMBODIA, EAST TIMOR, INDONESIA, DEMOCRATIC PEOPLE'S REPUBLIC OF KOREA, REPUBLIC OF KOREA, LAO PEOPLE'S DEMOCRATIC REPUBLIC, MACAU, MALAYSIA, MONGOLIA, MYANMAR, PHILIPPINES, SINGAPORE, TAIWAN, THAILAND, VIET NAM                                                                                                                                                                                                                                                                                                                                                                                                                                                                                                             |
| 13 | Rest of Asia          | XSA | AFGANISTAN, AMERICAN SAMOA, BANGLADESH, BHUTAN, BRITISH INDIAN OCEAN TERRITORY, BRUNEI DARUSSALAM, CHRISTMAS ISLAND, COCOS (KEELING) ISLANDS, COOK ISLANDS, FIJI, FRENCH POLYNESIA, FRENCH SOUTHERN TERRITORIES, GUAM, HEARD ISLAND AND MCDONALD ISLANDS, KIRIBATI, MALDIVES, MARSHALL ISLANDS, FEDERATED STATES OF MICRONESIA, NAURU, NEPAL, NEW CALEDONIA, NIUE, NORFOLK ISLAND, NORTHERN MARIANA ISLANDS, PAKISTAN, PALAU, PAPUA NEW GUINEA, PITCAIRN, SAMOA, SOLOMON ISLANDS, SRI LANKA, TOKELAU, TONGA, TUVALU, UNITED STATES MINOR OUTLYING ISLANDS, VANUATU, WALLIS AND FUTUNA                                                                                                                                           |
| 14 | Brazil                | BRA | BRAZIL                                                                                                                                                                                                                                                                                                                                                                                                                                                                                                                                                                                                                                                                                                                          |
| 15 | Rest of South America | XLM | ANGUILLA, ANTIGUA AND BARBUDA, ARGENTINA, ARUBA, BAHAMAS, BARBADOS, BELIZE, BERMUDA, BOLIVIA, BOUVET ISLAND, CAYMAN ISLANDS, CHILE, COLOMBIA, COSTA RICA, CUBA, DOMINICA, DOMINICAN REPUBLIC, ECUADOR, EL SALVADOR, FALKLANDS ISLANDS (MALVINAS), FRENCH GUIANA, GREENLAND, GRENADA, GUADELOUPE, GUATEMALA, GUYANA, HAITI, HONDURAS, JAMAICA, MARTINIQUE, MEXICO, MONTSERRAT, NETHERLANDS ANTILLES, NICARAGUA, PANAMA, PARAGUAY, PERU, PUERTO RICO, SAINT KITTS AND NEVIS, SAINT LUCIA, SAINT PIERRE AND MIQUELON, SAINT VINCENT AND THE GRENADINES, SOUTH GEORGIA AND THE SOUTH SANDWICH ISLANDS, SURINAME, TRINIDAD AND TOBAGO, TURKS AND CAICOS ISLANDS, URUGUAY, VENEZUELA, VIRGIN ISLANDS (BRITISH), VIRGIN ISLANDS (U.S.) |
| 16 | Middle East           | XME | BAHRAIN, ISLAMIC REPUBLIC OF IRAN, IRAQ, ISRAEL, JORDAN, KUWAIT, LEBANON, OMAN, QATAR, SAUDI ARABIA, SYRIAN ARAB REPUBLIC, UNITED ARAB EMIRATES, YEMEN                                                                                                                                                                                                                                                                                                                                                                                                                                                                                                                                                                          |
| 17 | Turkey                | TUR | TURKEY                                                                                                                                                                                                                                                                                                                                                                                                                                                                                                                                                                                                                                                                                                                          |

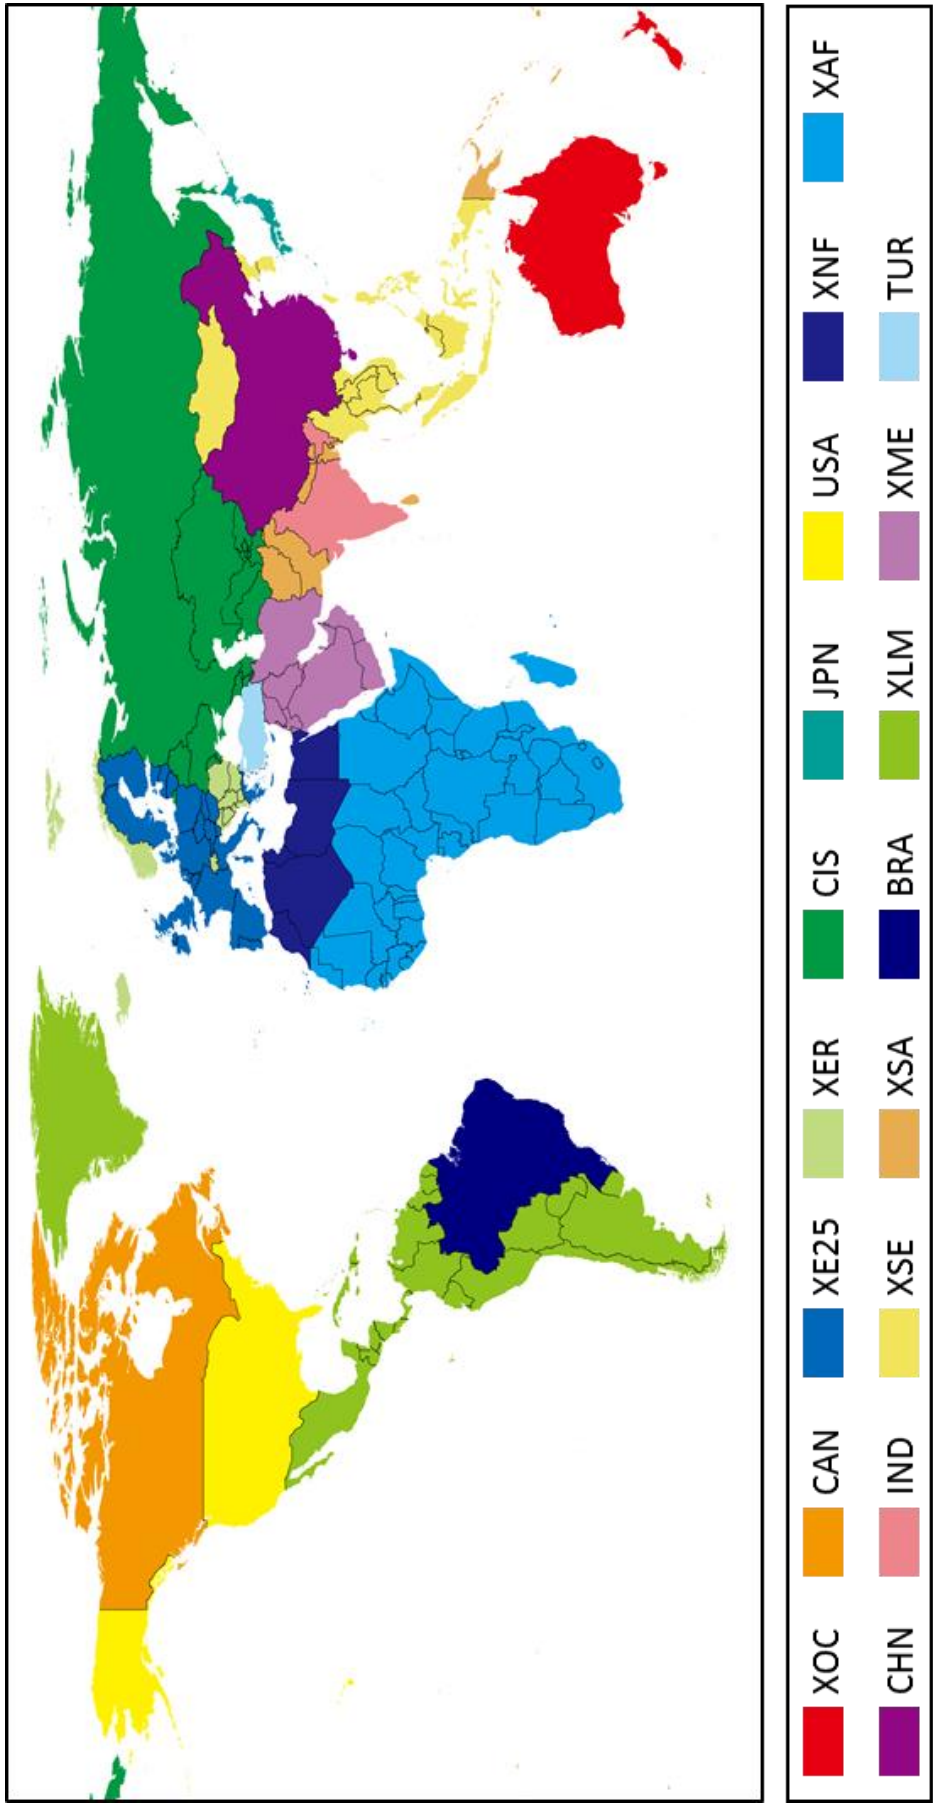

Figure S1 Distribution map of the AIM/CGE regions.

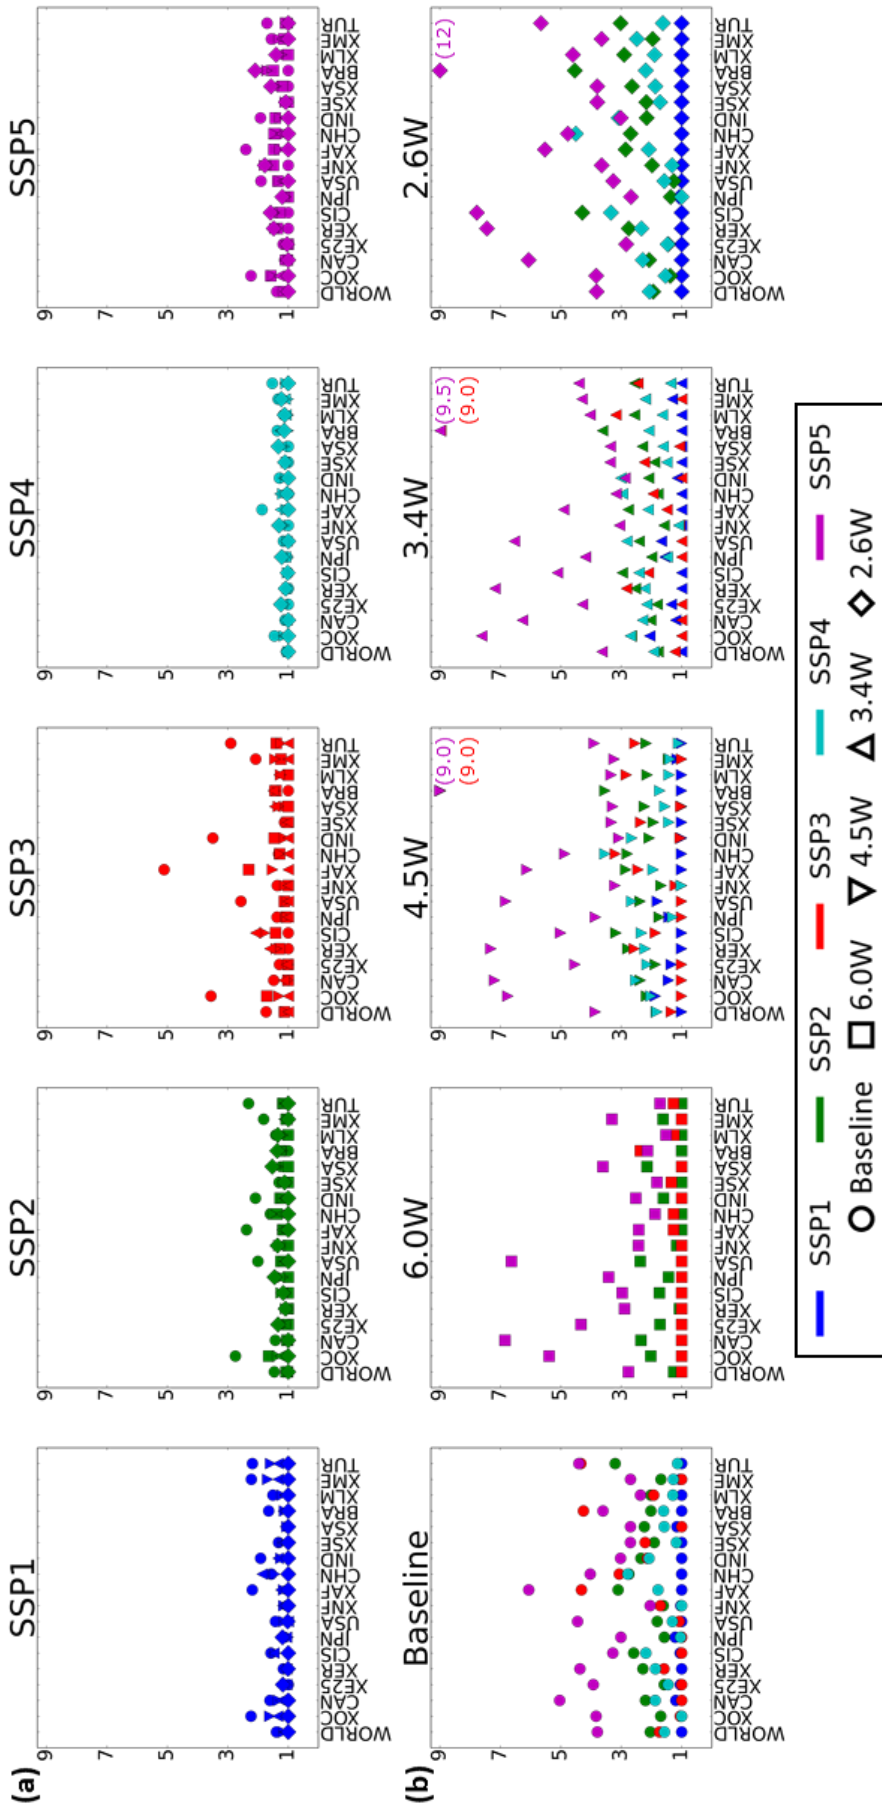

Figure S2 Regional water consumption differences under the recent-trend cooling case when (a) the Shared Socioeconomic Pathways (SSPs) is fixed and (b) the climate mitigation scenario is fixed in 2100. These values were calculated from the water consumption of each scenario divided by the minimum water consumption among scenarios. “1” represents the minimum water consumption among the climate mitigation scenarios in (a) and among the SSPs in (b). Values > 9 are plotted at 9 and noted in parentheses.



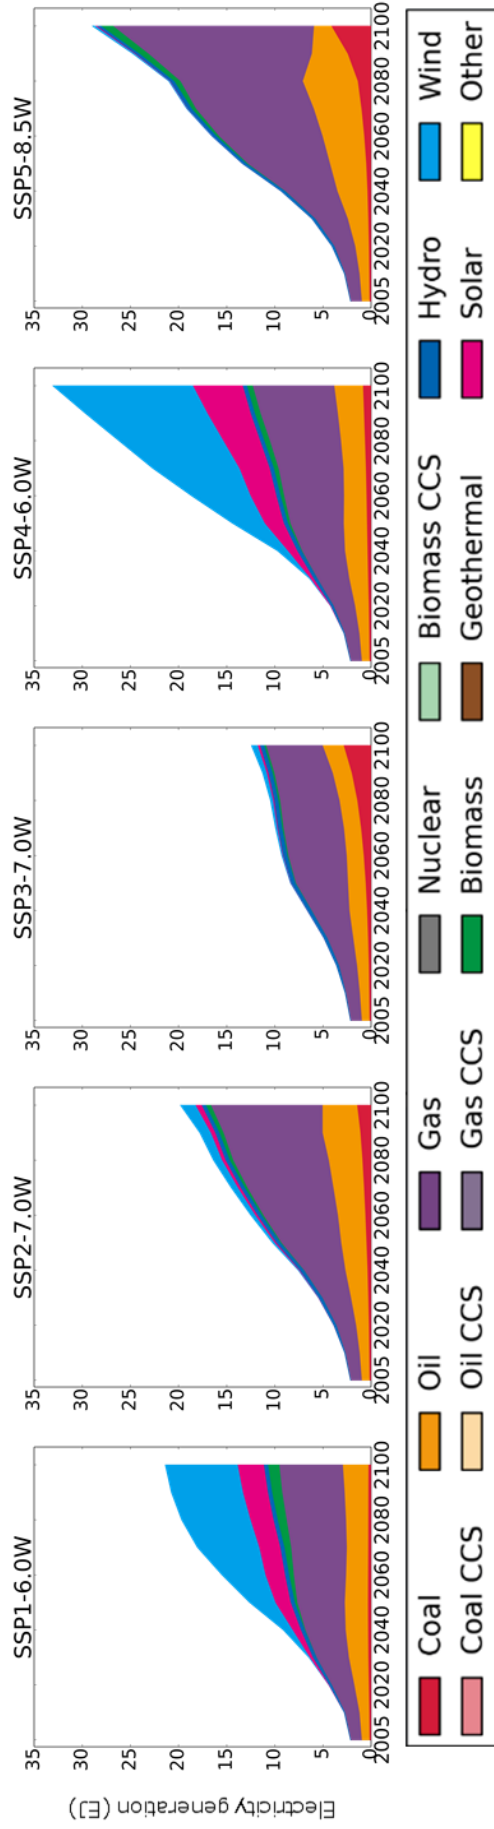

Figure S3 Electricity generation (EJ) by energy source under the baseline case for the SSPs in the Middle East.

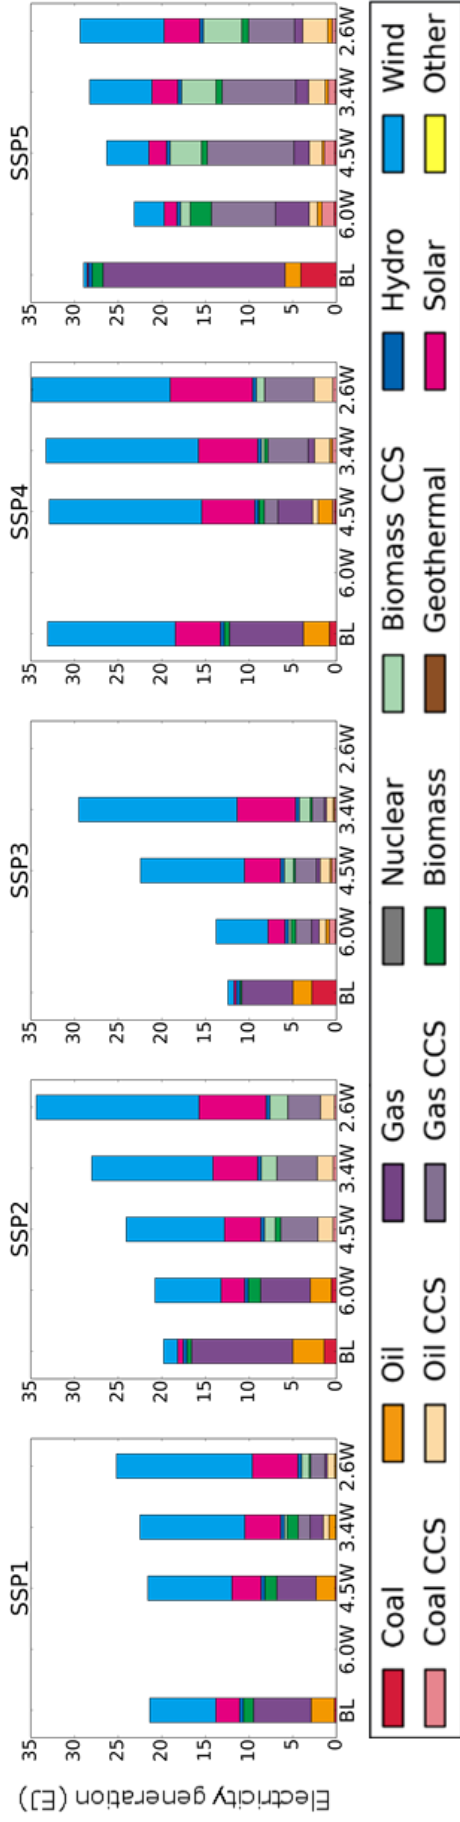

Figure S4 Electricity generation (EJ) by energy source in 2100 for the SSPs and climate mitigation scenarios in the Middle East. BL, baseline case.

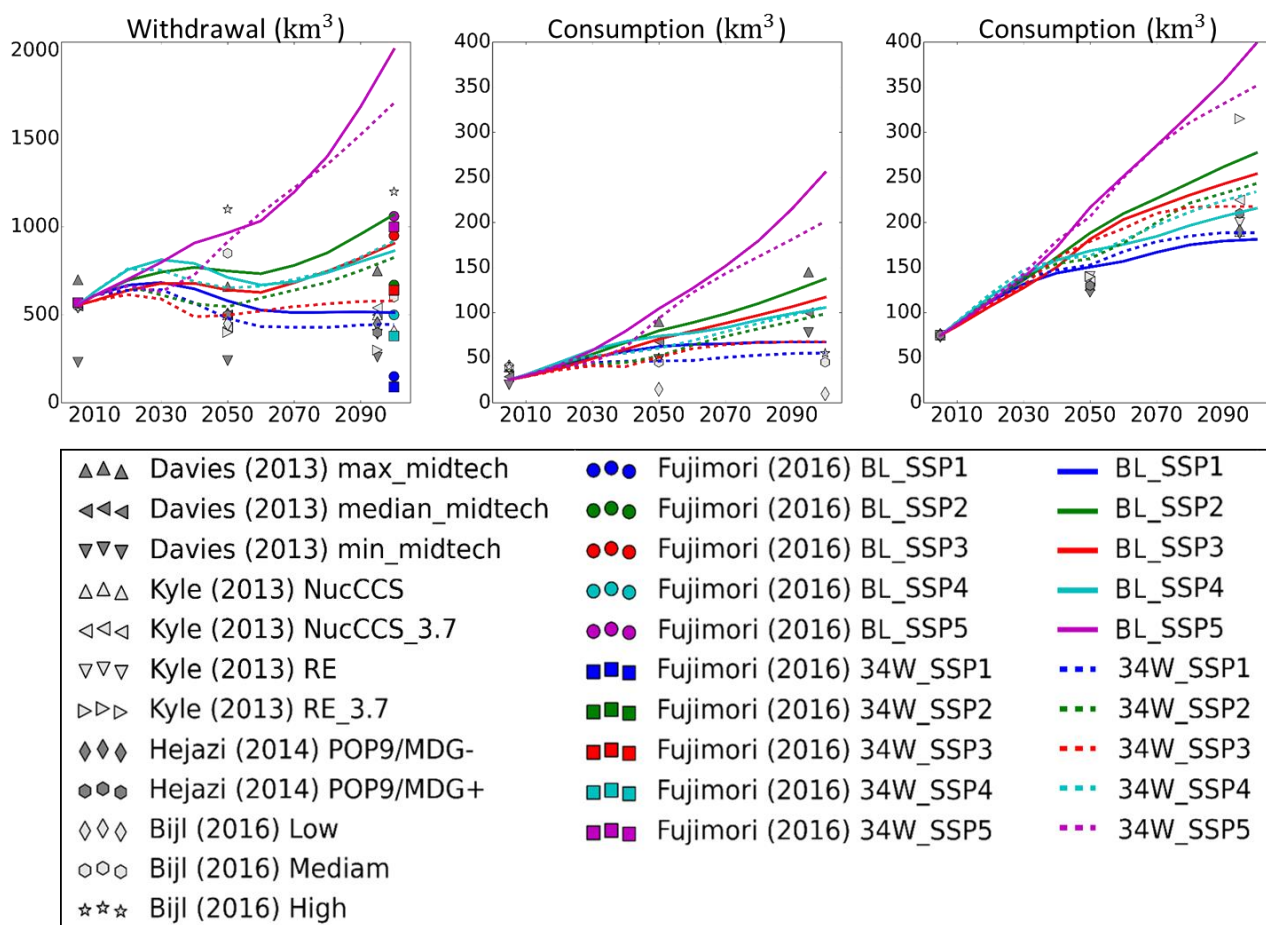

Figure S5 Projected total global water withdrawal (left), water consumption without hydropower (center), and water consumption with hydropower (right) compared with the results of previous studies. (Davies et al., 2013; Kyle et al., 2013; Hejazi et al., 2014; Bijl et al., 2016; Fujimori et al., 2016a). BL, baseline case. In Fujimori et al. (2016a), water withdrawal for electricity generation was estimated as part of industrial water.

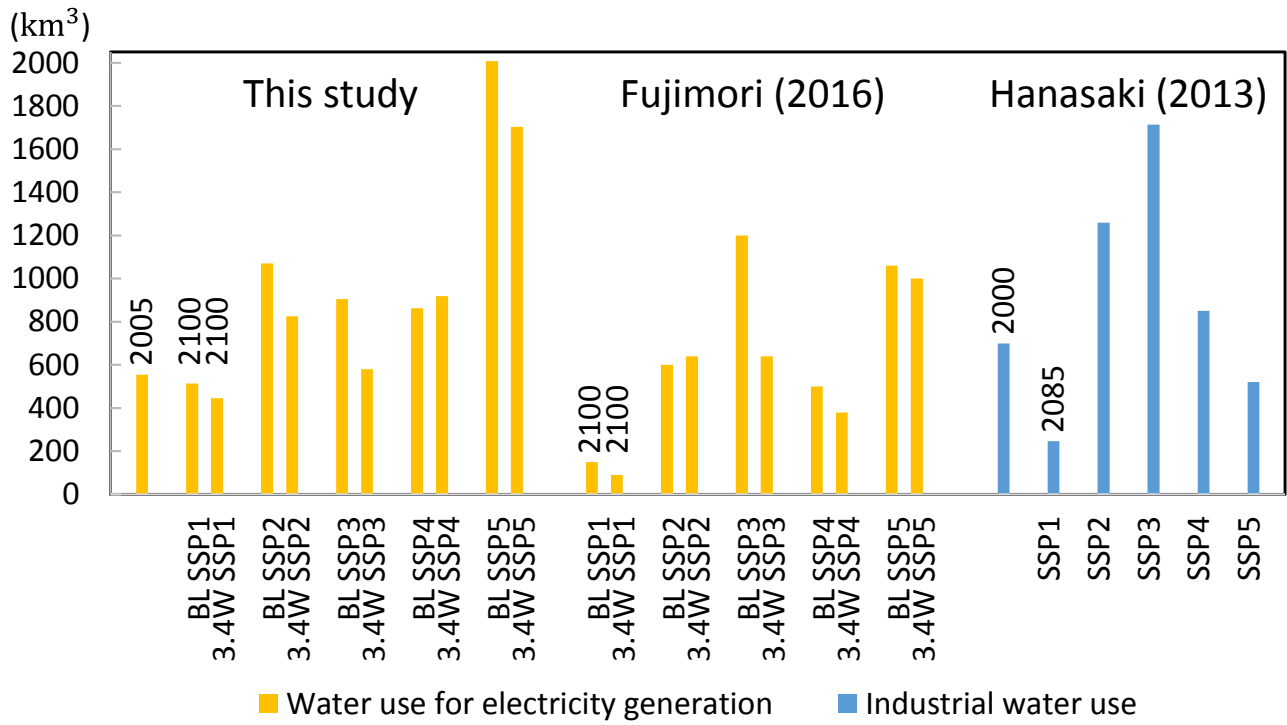

Figure S6 Global water withdrawal for electricity generation compared with the results of Fujimori et al. (2016a) and the industrial water withdrawal results of Hanasaki et al. (2013). BL, baseline case. In Fujimori et al. (2016a), water withdrawal for electricity generation was estimated as part of industrial water withdrawal.
